# Supplementary material for: miR-144 delivered by nasopharyngeal carcinoma-derived EVs stimulates angiogenesis through the FBXW7/HIF-1α/VEGF-A axis
Source: PubMed Central journal article supplement — Mol Ther Nucleic Acids. 2021 Apr 1;24:1000–11. doi: 10.1016/j.omtn.2021.03.016 (PMC8143977; doi:10.1016/j.omtn.2021.03.016), 2021-04-01
Supplement: mmc1.pdf [file mmc1.pdf]

OMTN, Volume 24

**Supplemental information**

**miR-144 delivered by nasopharyngeal  
carcinoma-derived EVs stimulates angiogenesis  
through the FBXW7/HIF-1 $\alpha$ /VEGF-A axis**

**Xiaoyan Tian, Yuehui Liu, Zhi Wang, and Shuhong Wu**

**Table S1 Primer sequences used for RT-qPCR.**

| Target        | Primer sequence (5'-3')             |
|---------------|-------------------------------------|
| miR-144       | F: 5'-TACAGTATAGATGATGTACT-3'       |
| FBXW7         | F: 5'-GTCCCGAGAAGCGGTTTGATA-3'      |
|               | R: 5'-TGCTCGGCACGTCAGAAAAG-3'       |
| HIF1 $\alpha$ | F: 5'-AGGTGGATATGTCTGGGTTG-3'       |
|               | R: 5'-AAGGACACATTCTCTGTTT-3'        |
| VEGF-A        | F: 5'-TGTGATTCTGATAAAATAGACATTGC-3' |
|               | R: 5'-TTTTTCCCCCACAATTATTACG-3'     |
| GAPDH         | F: 5'-GCACCGTCAAGGCTGAGAAC-3'       |
|               | R: 5'-TGGTGAAGACGCCAGTGGA-3'        |
